# Supplementary material for: Effects of Textile Effluent Fertilization on Germination, Growth and Metabolites of Chilli (Capsicum annum) Cultivars
Source: Research Square preprint supplement (doi:10.21203/rs.3.rs-226725/v1), 2021-02-15
Supplement: Supplementary file 1 [file 7ddbfa1be36f268a210842eb.docx]

**SUPPLEMENTRY FILE**

**Tables**

Table S1. Physico-chemical Characteristics of textile effluent (obtained from Singh and Rathore, 2018).

| **Physical Properties** | |
| --- | --- |
| Temperature | 38 oC |
| Colour | Brownish |
| Odour | Fishy |
| pH | 6.86±0.1 |
| **Chemical properties** | |
| Alkalinity (mEql-1) | 643±0.21 |
| EC (µS cm-1) | 438±0.43 |
| TS (mg l-1) | 2043±1.94 |
| TSS (mg l-1) | 97±1.63 |
| TDS (mg l-1) | 1909±1.08 |
| COD (mg l-1) | 1587±1.34 |
| chloride (mg l-1) | 693±0.51 |
| sulphate (mg l-1) | 286±0.37 |
| Phosphate (mg l-1) | 1.58±1.08 |
| Phenols (mg l-1) | 173.05±0.07 |
| Total nitrogen (mg l-1) | 80.13±1.5 |
| Ca (mg l-1) | 60.63±0.01 |
| Mg (mg l-1) | ND |
| **Elemental Properties** |  |
| Fe (mg l-1) | 1.2±0.063 |
| Zn (mg l-1) | 2.16±2.26 |
| Mn (mg l-1) | 1.1±0.05 |
| K (mg l-1) | 23.44±0.87 |
| Cr (mg l-1) | 4.22±2.34 |
| Pb (mg l-1) | ND |
| Cd (mg l-1) | 1.3±0.004 |
| Co (mg l-1) | 0.9±0.01 |
| Cu (mg l-1) | 1.3±0.002 |
| Al (mg l-1) | 14.3±0.03 |
| Ni (mg l-1) | 1.05±0.33 |
| **Biological properties** | |
| BOD5 ( at 20oC) (mg l-1) | 688 ±1.08 |
| CFUml-1×103 | 1.02× 106 |
| MPN/100 ml | 32.46 |

Table S2 Volume of textile effluent used in soil

| **Treatment** | **Soil Fertilization with textile effluents** |
| --- | --- |
| **C** | Soil |
| **T1** | 110 mL textile effluent kg-1 soil |
| **T2** | 220 mL textile effluent kg-1 soil |
| **T3** | 440 mL textile effluent kg-1 soil |
| **T4** | 660 mL textile effluent kg-1 soil |

Table S3. Summary of two-way ANOVA and levels of significance (*P<0.05, **P<0.01, ***P<0.001 and NS- not significant).

| **Parameters** | **Age** | | **Treatment** | | **Age×treatment** | |
| --- | --- | --- | --- | --- | --- | --- |
|  | **GVC-101** | **GVC-121** | **GVC-101** | **GVC-121** | **GVC-101** | **GVC-121** |
| **Leaf area (LA)** | * | *** | ** | *** | ** | *** |
| **Root length** | *** | *** | *** | *** | NS(0.127) | *** |
| **Shoot height** | *** | *** | *** | *** | *** | *** |
| **RSR** | *** | *** | NS(0.131) | ** | NS(0.415) | ** |
| **Chlorophyll ‘*a*’** | *** | *** | *** | *** | *** | *** |
| **Chlorophyll ‘*b*’** | *** | *** | *** | *** | ** | ** |
| **Total chlorophyll** | *** | *** | *** | *** | *** | ** |
| **Carotenoid** | *** | *** | *** | *** | *** | *** |
| **Protein** | *** | *** | *** | *** | *** | *** |
| **Total carbohydrate** | *** | *** | *** | *** | *** | *** |
| **Proline** | *** | *** | *** | *** | NS(0.425) | NS(0.560) |
